# Supplementary material
Source: PubMed Central journal article supplement (PMC7416689)
Supplement: mmc1.pdf [file mmc1.pdf]

## **SARS-CoV-2 Causes a Specific Dysfunction of the Kidney Proximal Tubule**

Alexis Werion\*, Leila Belkhir\*, Marie Perrot, Gregory Schmit, Selda Aydin, Zhiyong Chen,  
Andrea Penaloza, Julien De Greef, Halil Yildiz, Lucie Pothen, Jean Cyr Yombi, Joseph  
Dewulf, Anais Scohy, Ludovic Gérard, Xavier Wittebole, Pierre-François Laterre,  
Sara E. Miller, Olivier Devuyst\*<sup>¶</sup>, Michel Jadoul\*<sup>¶</sup>, Johann Morelle\*<sup>¶</sup>  
on behalf of the CUSL COVID-19 Research Group

### ***Supplementary material***

#### **Table of content**

|                                                                                                                                                  |     |
|--------------------------------------------------------------------------------------------------------------------------------------------------|-----|
| <b>Suppl. Fig. 1.</b> Flowchart of the study.....                                                                                                | P3  |
| <b>Suppl. Fig. 2.</b> Presence of proximal tubule dysfunction signs at the individual level in patients with COVID-19 ..                         | P4  |
| <b>Suppl. Fig. 3.</b> Low-molecular weight proteinuria in patients with COVID-19 and controls ..                                                 | P6  |
| <b>Suppl. Fig. 4.</b> Expression of ACE2 in the proximal tubule and interaction with solute transporters ..                                      | P7  |
| <b>Suppl. Fig. 5.</b> Proximal tubule lesions in the kidneys of patients with COVID-19.....                                                      | P10 |
| <b>Suppl. Table 1.</b> Baseline characteristics and treatment of patients who underwent routine versus specific urinalysis ..                    | P12 |
| <b>Suppl. Table 2.</b> Characteristics of COVID-19 patients of whom urine was tested for the presence of LMW proteins by immunoblot (Fig. 1D) .. | P16 |
| <b>Suppl. Table 3.</b> Urinary concentration of aminoacids in patients with COVID-19 ..                                                          | P17 |
| <b>Suppl. Table 4.</b> Characteristics of COVID-19 patients with and without elevated urinary $\beta$ 2-microglobulin ..                         | P18 |
| <b>Suppl. Table 5.</b> Characteristics of COVID-19 patients with and without hypouricemia and inappropriate uricosuria ..                        | P19 |

|                                                                                                                                                                       |     |
|-----------------------------------------------------------------------------------------------------------------------------------------------------------------------|-----|
| <b>Suppl. Table 6.</b> Characteristics of COVID-19 patients with and without hypophosphatemia and inappropriate phosphaturia .....                                    | P20 |
| <b>Suppl. Table 7.</b> Characteristics of COVID-19 patients with and without aminoaciduria .....                                                                      | P21 |
| <b>Suppl. Table 8.</b> Cox and competing risks regressions for time to invasive mechanical ventilation according to the presence of proximal tubule dysfunction ..... | P22 |
| <b>Suppl. Table 9.</b> Characteristics of COVID-19 patients with post-mortem examination of the kidneys .....                                                         | P23 |
| <b>Suppl. Table 10.</b> Pathologic evaluation of kidneys from patients with COVID-19 .....                                                                            | P24 |
| <b>Suppl. Table 11.</b> Mouse primer pairs for gene expression analysis .....                                                                                         | P25 |

**Supplementary Figure 1. Flowchart of the study.**

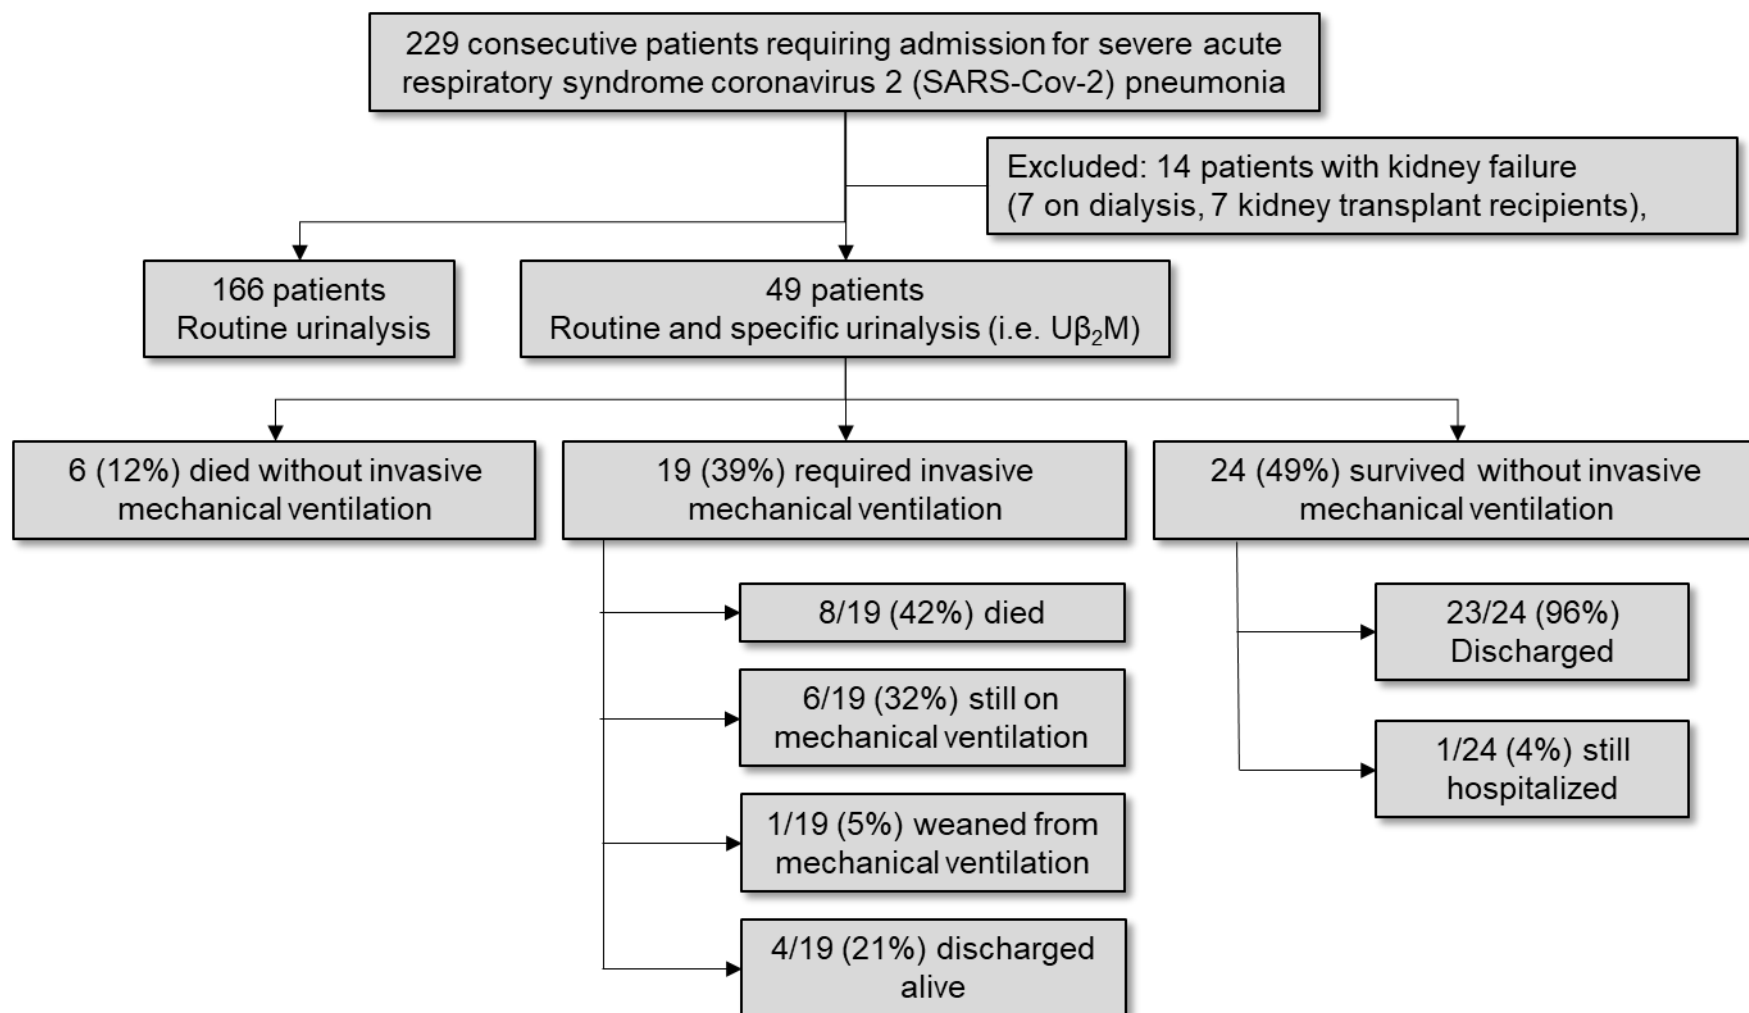

Uβ<sub>2</sub>M, urinary β<sub>2</sub>-microglobulin.

**Supplementary Figure 2. Manifestations of proximal tubule dysfunction in individual patients with COVID-19.**

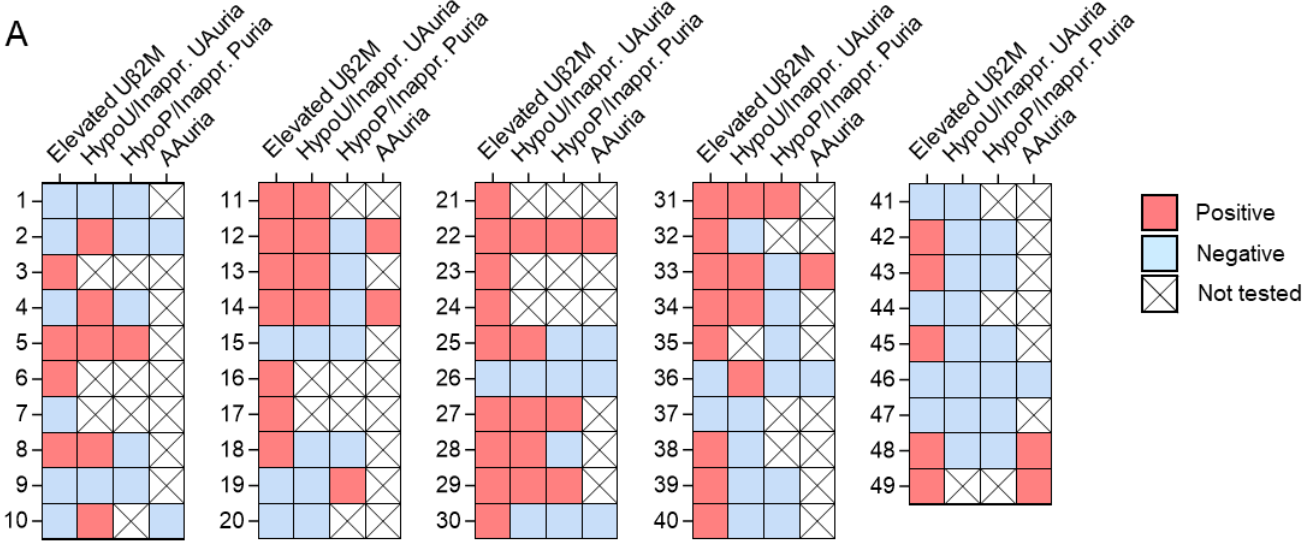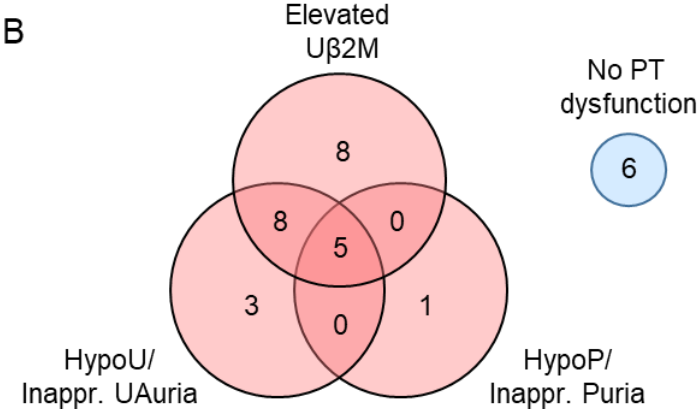

**A.** Presence (red) or absence (blue) of elevated urinary  $\beta_2$ -microglobulin ( $U\beta_2M$ ), hypouricemia with inappropriate uricosuria (HypoU/Inappr. UAuria), hypophosphatemia with inappropriate phosphaturia (HypoP/Inappr. Puria) and aminoaciduria (AAuria) in the 49 patients included in the study (rows labelled from 1 to 49). Patients who were not tested are represented by ticked boxes.

**B.** Distribution and co-existence of signs of PT dysfunction among the 31 patients with available testing for  $U\beta_2M$ , HypoU/Inappr. UAuria, and HypoP/Inappr. Puria. The presence of AAuria was not included in the diagram because of the small number of patients tested. Numbers in circles indicate how many patients present the respective PT defects or combinations of them.

**Supplementary Figure 3. Low-molecular weight proteinuria in patients with COVID-19 and controls.**

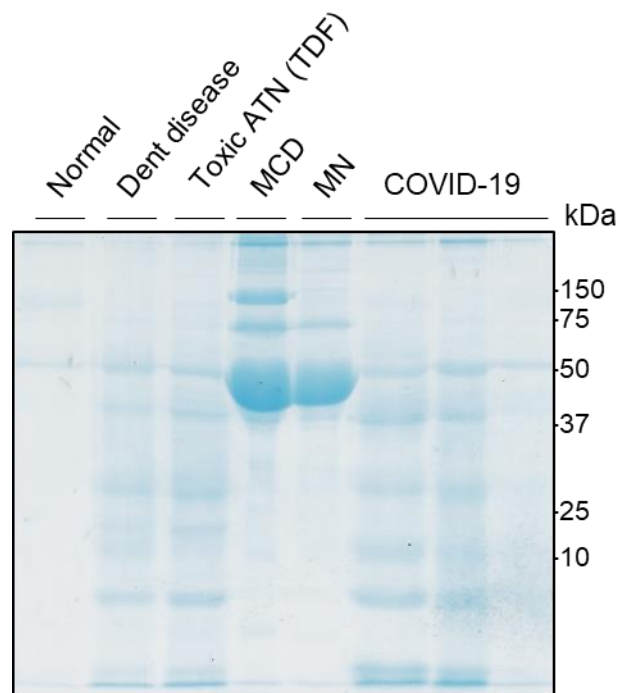

Sodium dodecyl sulfate polyacrylamide gel electrophoresis followed by Coomassie blue staining shows the presence of low-molecular weight proteins in the urine of some patients with COVID-19, compared to patients with Dent disease, toxic acute tubular necrosis (ATN) secondary to tenofovir disoproxil fumarate (TDF), or heavy albuminuria caused by minimal change disease (MCD) or membranous nephropathy (MN). Each lane was loaded with 5-20  $\mu$ l of urine after normalization for urinary creatinine concentration.

Supplementary Figure 4. Expression of ACE2 in the proximal tubule and interaction with solute transporters.

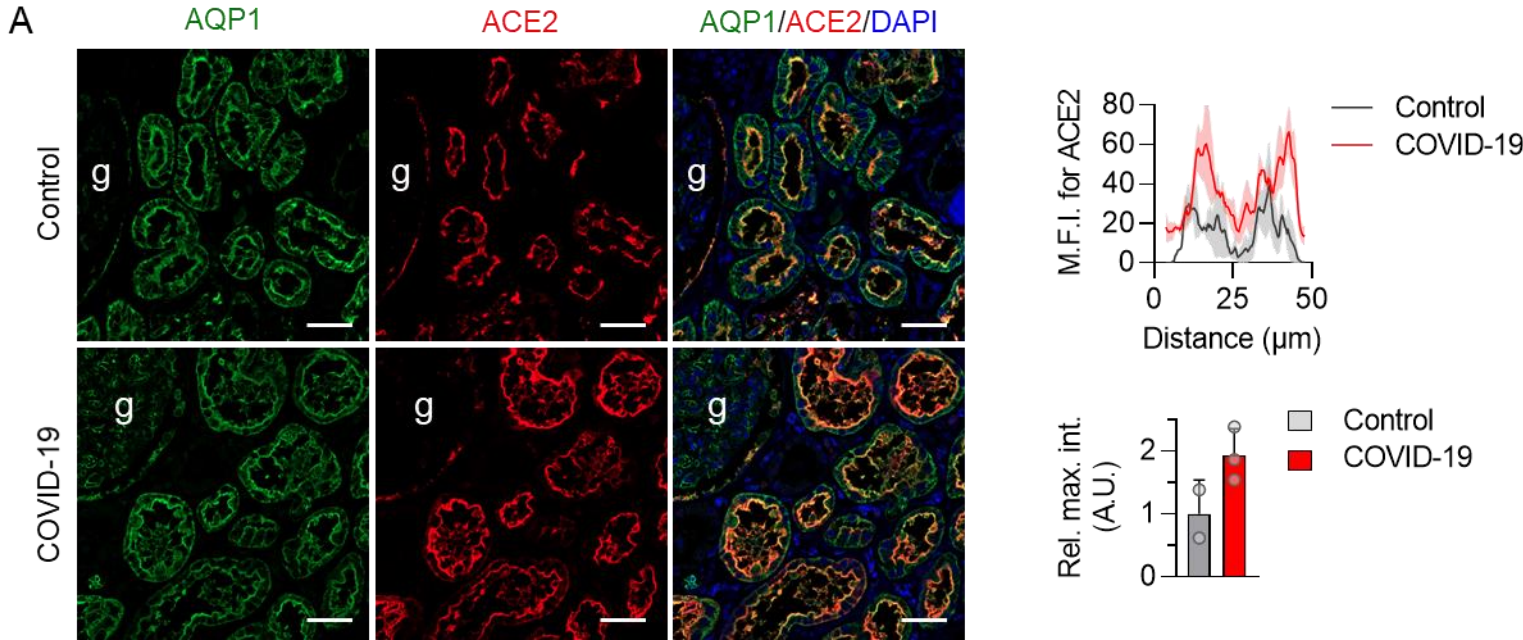

**B**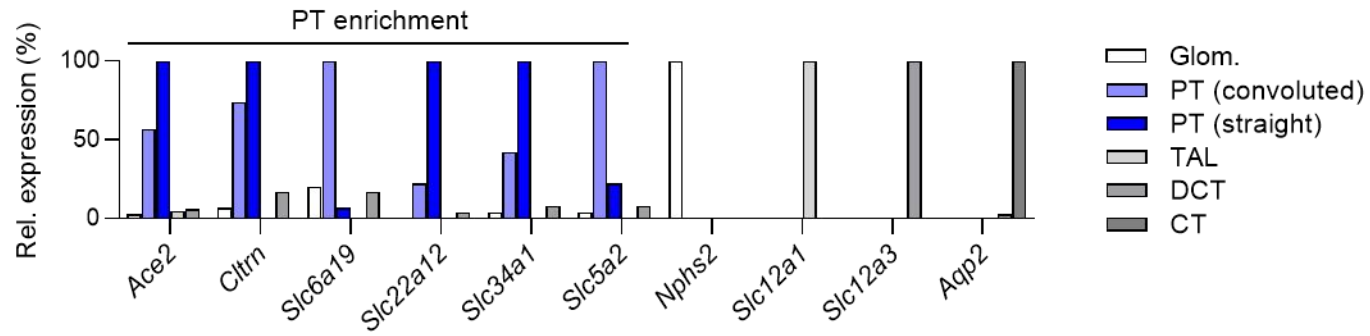**C**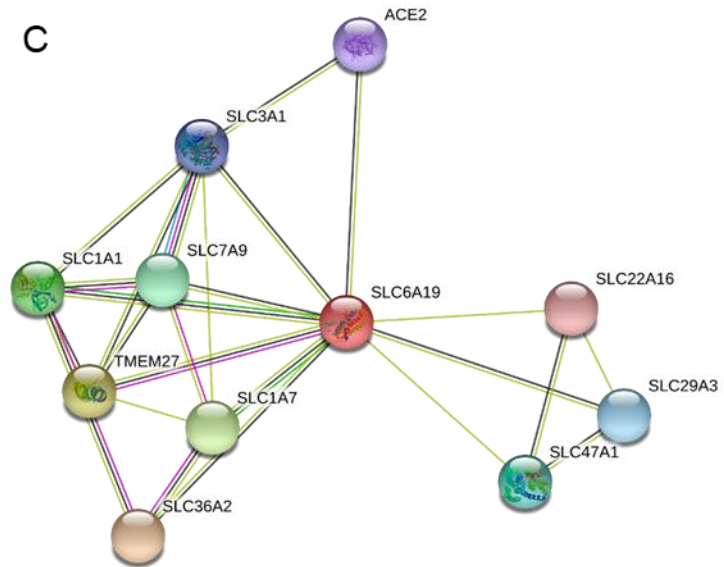**D**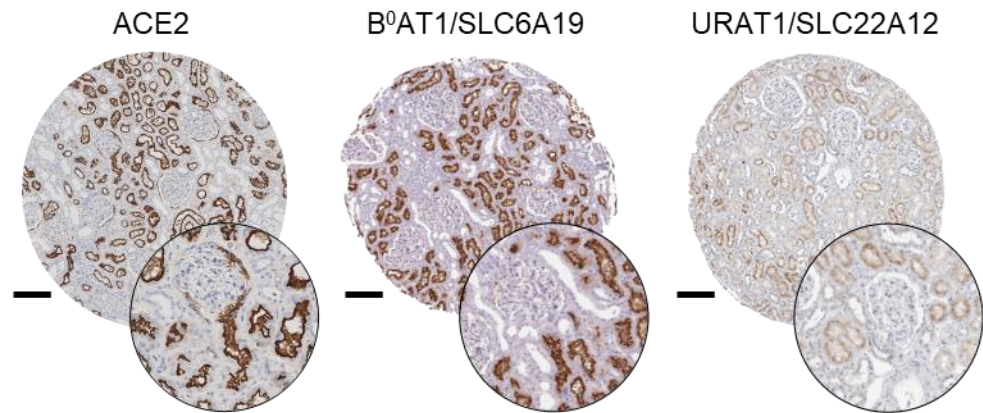



**A.** Representative pictures of double immunostaining with anti-AQP1 (green channel) and anti-ACE2 (red channel) antibodies viewed under confocal fluorescence microscopy in kidney sections from a control and a patient with COVID-19. Nuclei are stained with DAPI (blue channel). Original magnification, 20x. Bars, 50  $\mu$ m. Mean fluorescence intensity (M.F.I.) profiles and relative maximal intensity (rel. max. int.) for ACE2 were quantified on cross-sectional sections of PT from 2 controls (grey) and 3 patients who died of COVID-19 (red). Data are mean values and s.e.m.

**B.** mRNA levels of *Ace2* (encoding for SARS-Cov-2 receptor ACE2), *Cltr* (collectrin or TMEM27), *Slc6a19* (B<sup>0</sup>AT1), *Slc22a12* (URAT1), and *Slc34a1* (NaPi-IIa) in specific segments of the mouse nephron analyzed by SYBR green–quantitative PCR. Segment–related genes were used to assess the purity of each fraction: glomerulus (glom.), *Nphs2*, white bars; proximal tubule (PT) (convoluted), *Scl5a2*, light blue; PT (straight), *Slc38a3*, dark blue; thick ascending limb (TAL) of Henle’s loop, *Slc12a1*, light grey; distal convoluted tubule (DCT), *Slc12a3*, intermediate grey; collecting duct (CT), *Aqp2*, dark grey. Quantification of targeted gene was done in comparison with *Gapdh* (n=4).

**C.** Connectivity network of the interactions between human SLC6A19 (B<sup>0</sup>AT1) and other proteins including the SARS-Cov-2 receptor ACE2 and the related protein TMEM27 (collectrin), established using the STRING (Search Tool for the Retrieval of Interacting Genes/Proteins) database. <https://string-db.org/cgi/network.pl?taskId=rsSG9HZgqGNS> (accessed on May 31, 2020).

**D.** Expression of ACE2, URAT1/SLC22A12 and B<sup>0</sup>AT1/SLC6A19 in the normal human kidney. URAT1 and B<sup>0</sup>AT1 staining were obtained from the Human Protein Atlas, v15.proteinatlas.org, accessed on May 26, 2020.

**Supplementary Figure 5.** Proximal tubule lesions in the kidneys of patients with COVID-19.

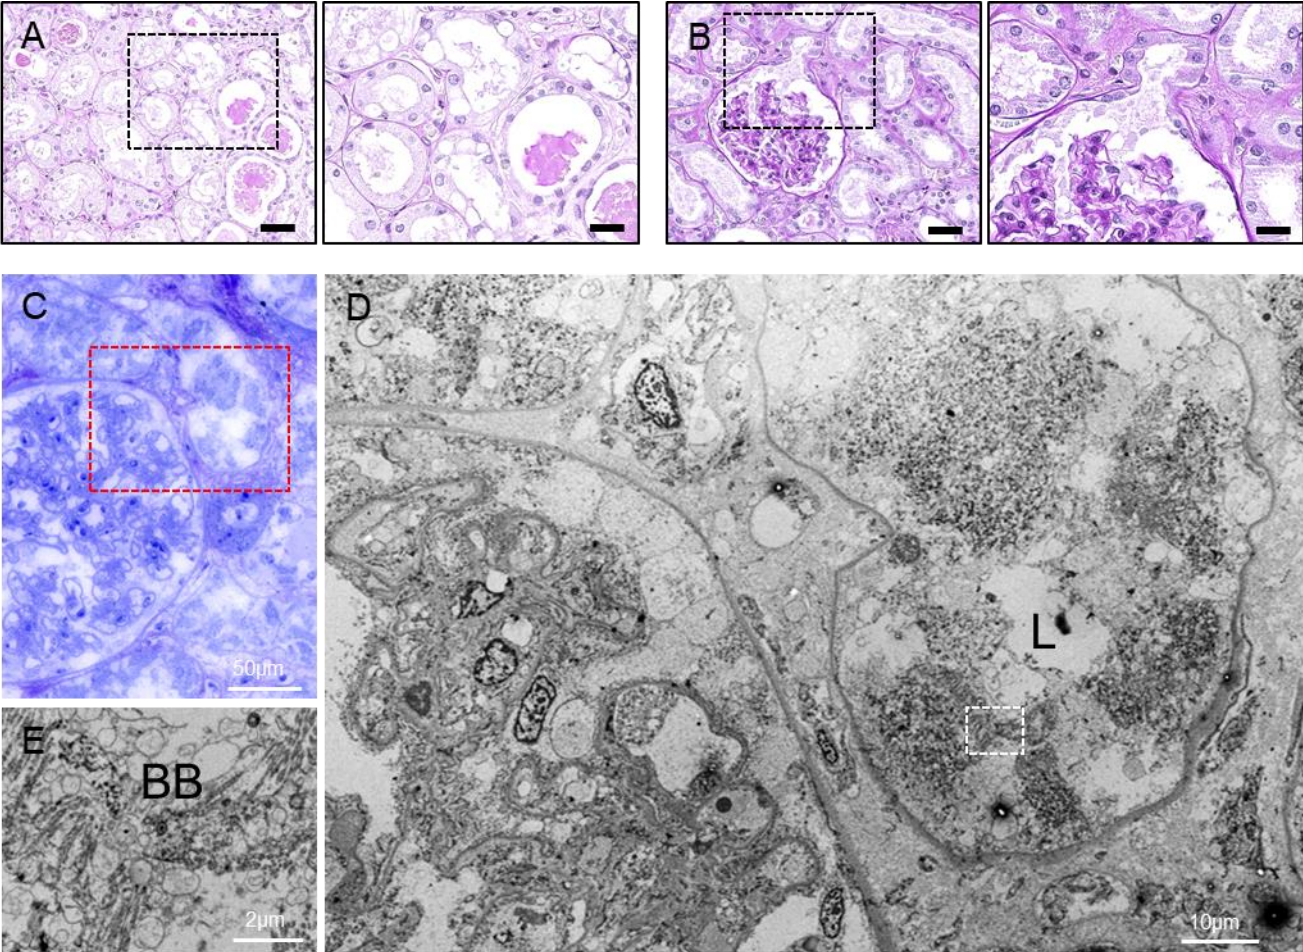

- A.** Periodic-acid Schiff-stained sections showing tubular injury and vacuolization of proximal tubule cells in a non-diabetic patient who did not receive intravenous iodine-contrast media nor immunoglobulins.
- B.** Periodic-acid Schiff-stained sections showing alterations of the brush border in the S1 segment of the proximal tubule (B). Original magnification (A and B), 20x and 40x; scale bars, 50  $\mu\text{m}$  and 25  $\mu\text{m}$ .
- C.** Toluidine blue staining of semi-thin section, showing disorganization of proximal tubule architecture close to a damaged glomerulus and a relatively preserved macula densa. Red square contains image observed by transmission electron microscopy (TEM).
- D.** Ultrastructure of proximal tubule and glomerulus by TEM, showing the degeneration of proximal tubule epithelial cells and extensive cytoplasmic vacuolization. Vacuolated parietal epithelial cells were also observed at the Bowman's capsule. The basement membrane structures remain relatively well-preserved for both proximal tubule and Bowman's capsule. White square contains image at higher magnification.
- E.** Disorganized residual brush border among luminal debris in the proximal tubule. L: Lumen, BB: brush border.

**Supplementary Table 1. Baseline characteristics and treatment of patients who underwent routine versus specific urinalysis.**

|                                                  | <b>Whole cohort</b> | <b>Routine urinalysis</b> | <b>Specific urinalysis</b> |
|--------------------------------------------------|---------------------|---------------------------|----------------------------|
| <b>Demographics and comorbidities</b>            | <b>n=215</b>        | <b>n=166</b>              | <b>n=49</b>                |
| Age, median (IQR), years                         | 67 (56-81)          | 67 (56-84)                | 64 (54-74)                 |
| Male gender – no. (%)                            | 117 (54)            | 83 (50)                   | 34 (69)                    |
| <b>Ethnicity – no. (%)</b>                       |                     |                           |                            |
| Caucasian                                        | 180 (84)            | 138 (83)                  | 42 (86)                    |
| Sub-Saharan African                              | 31 (14)             | 25 (15)                   | 6 (12)                     |
| Other                                            | 4 (2)               | 3 (2)                     | 1 (2)                      |
| Cardiovascular disease – no. (%)                 | 49 (23)             | 40 (24)                   | 9 (18)                     |
| Chronic kidney disease – no. (%)                 | 43 (20)             | 36 (22)                   | 7 (14)                     |
| Hypertension – no. (%)                           | 105 (49)            | 82 (49)                   | 23 (47)                    |
| Diabetes – no. (%)                               | 51 (24)             | 41 (25)                   | 10 (20)                    |
| Human immunodeficiency virus infection – no. (%) | 3 (1)               | 3 (2)                     | 0 (0)                      |
| Chronic liver disease – no. (%)                  | 5 (2)               | 4 (2)                     | 1 (2)                      |
| Chronic pulmonary disease – no. (%)              | 21 (10)             | 15 (9)                    | 5 (12)                     |
| <b>Medications – no. (%)</b>                     |                     |                           |                            |
| Allopurinol or febuxostat                        | 12 (6)              | 8 (5)                     | 4 (8)                      |
| Angiotensin receptor blocker                     | 31 (14)             | 21 (13)                   | 10 (20)                    |
| ACE inhibitor                                    | 43 (20)             | 33 (20)                   | 10 (20)                    |

|                                                       |               |               |               |
|-------------------------------------------------------|---------------|---------------|---------------|
| Chronic immunosuppressive treatment <sup>a</sup>      | 16 (7)        | 12 (7)        | 4 (8)         |
| Anti-cancer drugs <sup>b</sup>                        | 9 (4)         | 5 (3)         | 4 (8)         |
| <b>Symptoms and vitals at admission</b>               |               |               |               |
| Duration of symptoms, median (IQR), days              | 6 (2-8)       | 6 (2-8)       | 7 (3-9)       |
| Symptoms at admission – no. (%)                       |               |               |               |
| Fever                                                 | 165/214 (77)  | 126/165 (76)  | 39 (80)       |
| Cough                                                 | 140/213 (66)  | 111/164 (76)  | 29 (59)       |
| Dyspnea                                               | 148/213 (69)  | 113/164 (69)  | 35 (71)       |
| Sore throat                                           | 24/213 (11)   | 22/164 (13)   | 2 (4)         |
| Confusion                                             | 27/213 (13)   | 21/164 (13)   | 6 (12)        |
| Anosmia/ageusia                                       | 19/213 (9)    | 13/164 (8)    | 6 (12)        |
| Rhinitis                                              | 38/213 (18)   | 31/164 (19)   | 7 (14)        |
| Diarrhea                                              | 50/213 (23)   | 36/164 (22)   | 14 (29)       |
| Chest pain                                            | 14/213 (7)    | 10/164 (6)    | 4 (8)         |
| Admission via emergency department – no. (%)          | 208 (97)      | 161 (97)      | 47 (96)       |
| SaO <sub>2</sub> , median (IQR), %                    | 91 (88-95)    | 91 (88-95)    | 92 (87-96)    |
| Systolic BP, median (IQR), mmHg                       | 134 (121-149) | 132 (120-148) | 139 (126-150) |
| Diastolic BP, median (IQR), mmHg                      | 77 (68-84)    | 77 (68-85)    | 75 (69-82)    |
| Heart rate, median (IQR), bpm                         | 90 (82-102)   | 90 (80-101)   | 93 (88-103)   |
| <b>Lab tests and dipstick urinalysis at admission</b> |               |               |               |
| hsCRP, median (IQR), mg/l                             | 77 (39-130)   | 71 (35-125)   | 105 (54-146)  |

|                                                             |                |                |                |
|-------------------------------------------------------------|----------------|----------------|----------------|
| Glycemia, median (IQR), mg/dl                               | 119 (105-139)  | 117 (105-139)  | 121 (109-146)  |
| Serum creatinine, median (IQR), mg/dl                       | 1.0 (0.8-1.2)  | 1.0 (0.8-1.3)  | 1.0 (0.8-1.2)  |
| eGFR, median (IQR), ml/min/1.73 m <sup>2</sup>              | 71 (49-84)     | 71 (48-84)     | 72 (54-92)     |
| Serum uric acid, median (IQR), mg/dl                        | 4.8 (3.7-6.2)  | 4.8 (3.8-6.3)  | 4.9 (3.3-5.9)  |
| Sodium, median (IQR), mmol/l                                | 137 (134-140)  | 137 (134-140)  | 135 (133-138)  |
| Bicarbonate, median (IQR), mmol/l                           | 24 (22-26)     | 25 (23-27)     | 23 (22-25)     |
| AST, median (IQR), IU/l                                     | 36 (27-59)     | 36 (27-61)     | 36 (24-53)     |
| ALT, median (IQR), IU/l                                     | 27 (17-44)     | 27 (17-43)     | 27 (17-46)     |
| Total bilirubin, median (IQR), mg/dl                        | 0.5 (0.4-0.6)  | 0.5 (0.3-0.6)  | 0.5 (0.4-0.7)  |
| CK, median (IQR), IU/l                                      | 116 (65-293)   | 116 (62-293)   | 119 (74-211)   |
| LDH, median (IQR), IU/l                                     | 353 (272-452)  | 353 (267-448)  | 356 (279-491)  |
| Lymphocytes, median (IQR), n/ $\mu$ l                       | 840 (600-1160) | 870 (650-1180) | 650 (500-1060) |
| Platelets, median (IQR), 10 <sup>3</sup> / $\mu$ l          | 204 (139-254)  | 204 (146-259)  | 203 (131-233)  |
| Dipstick proteinuria – no. (%)                              |                |                |                |
| 0                                                           | 36/169 (21)    | 28/126 (22)    | 8/43 (19)      |
| 1+                                                          | 55/169 (33)    | 42/126 (33)    | 13/43 (30)     |
| 2+                                                          | 68/169 (40)    | 49/126 (39)    | 19/43 (44)     |
| 3+                                                          | 10/169 (6)     | 7/126 (6)      | 3/43 (7)       |
| <b>Computed tomography scan of the chest upon admission</b> |                |                |                |
| Extent of lesions on chest CT scan – no. (%)                |                |                |                |
| <10%                                                        | 26/173 (15)    | 22/128 (17)    | 4/45 (9)       |

|        |             |             |            |
|--------|-------------|-------------|------------|
| 10-25% | 65/173 (38) | 47/128 (37) | 18/45 (40) |
| 25-50% | 54/173 (31) | 40/128 (31) | 14/45 (31) |
| >50%   | 28/173 (16) | 19/128 (15) | 9/45 (20)  |

#### Drugs received for COVID-19

|                                               |          |          |         |
|-----------------------------------------------|----------|----------|---------|
| Hydroxychloroquine – no. (%)                  | 177 (82) | 129 (78) | 48 (98) |
| Azithromycin – no. (%)                        | 24 (11)  | 17 (10)  | 7 (14)  |
| Anti-viral drugs <sup>c</sup> – no. (%)       | 2 (1)    | 2 (1)    | 0 (0)   |
| Immunomodulatory drugs <sup>d</sup> - no. (%) | 30 (14)  | 14 (8)   | 16 (33) |

<sup>a</sup>Chronic immunosuppressive treatment included (one or more per patient) ciclosporin A (1), corticosteroids (10), methotrexate (2), rituximab (1), etanercept (1), mycophenolate mofetil (1), ocrelizumab (1), tocilizumab (2).

<sup>b</sup>Anti-cancer drugs included cyclophosphamide (1), doxorubicine (1), vincristine (1), venetoclax (1), cisplatin (2), cytarabine (1), axitinib (1), bortezomib (2), thalidomide/pomalidomide (2), paclitaxel (1). <sup>c</sup>Antiviral drugs included favipiravir (1) and lopinavir (1). <sup>d</sup>Immunomodulatory drugs for COVID-19 (one or more per patient) included corticosteroids (18), interleukin-7 (11), tocilizumab (1). Continuous variables are expressed as median and interquartile range (IQR), and categorical variables as numbers (no.) and percentages (%). SaO<sub>2</sub>, oxygen saturation while breathing ambient air; BP, blood pressure; eGFR, CKD-EPI estimated glomerular filtration rate; hsCRP, highly-sensitive C-reactive protein; AST, aspartate aminotransferase; ALT, alanine aminotransferase; CK, creatine kinase; LDH, lactate dehydrogenase; CT, computed tomography.

**Supplementary Table 2.** Characteristics of COVID-19 patients of whom urine was tested for the presence of LMW proteins by immunoblot (Fig. 1D).

|             | <b>Age</b>     |               |                     |                 |
|-------------|----------------|---------------|---------------------|-----------------|
| <b>Lane</b> | <b>(years)</b> | <b>Gender</b> | <b>Hypertension</b> | <b>Diabetes</b> |
| 1           | 68             | Male          | -                   | +               |
| 2           | 63             | Male          | +                   | -               |
| 3           | 47             | Male          | -                   | -               |
| 4           | 64             | Male          | -                   | -               |
| 5           | 46             | Male          | +                   | -               |
| 6           | 82             | Female        | +                   | -               |
| 7           | 59             | Male          | +                   | +               |



**Supplementary Table 3. Urinary concentration of aminoacids in COVID-19 patients.**

| (mmol/mol creat.) | Normal range | Aminoaciduria<br>(n=6) | No aminoaciduria<br>(n=7) |
|-------------------|--------------|------------------------|---------------------------|
| <b>Neutral</b>    |              |                        |                           |
| Threonine         | 7-29         | 93±80                  | 15±4                      |
| Serine            | 21-50        | 133±48                 | 36±11                     |
| Asparagine        | 0-23         | 70±29                  | 13±4                      |
| Glutamine         | 20-76        | 138±46                 | 43±15                     |
| Tyrosine          | 2-23         | 26±7                   | 9±3                       |
| Tryptophan        | 2-10         | 14±4                   | 5±4                       |
| Alanine           | 16-68        | 72±34                  | 26±5                      |
| Glycine           | 43-173       | 173±93                 | 59±27                     |
| Isoleucine        | 0-4          | 3±1                    | 2±1                       |
| Leucine           | 2-11         | 5±1                    | 5±3                       |
| Valine            | 3-13         | 9±1                    | 5±3                       |
| Methionine        | 2-16         | 8±2                    | 7±2                       |
| 1/2 cystine       | 6-34         | 29±7                   | 17±6                      |
| Phenylalanine     | 2-19         | 15±4                   | 7±2                       |
| Proline           | 0-9          | 1±0                    | 1±1                       |
| <b>Basic</b>      |              |                        |                           |
| Arginine          | 0-5          | 4±1                    | 2±2                       |
| Histidine         | 26-153       | 121±34                 | 48±37                     |
| Lysine            | 7-58         | 64±37                  | 36±20                     |
| <b>Acidic</b>     |              |                        |                           |
| Aspartate         | 2-7          | 5±2                    | 5±1                       |
| Glutamate         | 0-12         | 10±3                   | 4±2                       |

Data are means ± SD (mmol/mol creatinine).

**Supplementary Table 4. Characteristics of COVID-19 patients with and without elevated urinary  $\beta_2$ -microglobulin.**

|                                                   | Normal U $\beta_2$ M<br>n=16 | Elevated U $\beta_2$ M<br>n=33 | P     |
|---------------------------------------------------|------------------------------|--------------------------------|-------|
| <b>Baseline characteristics</b>                   |                              |                                |       |
| Age, median (IQR), years                          | 63 (57-71)                   | 64 (54-76)                     | 0.91  |
| Male gender – no. (%)                             | 9 (56)                       | 25 (76)                        | 0.17  |
| Fever – no. (%)                                   | 12 (75)                      | 27 (82)                        | 0.58  |
| Dyspnea – no. (%)                                 | 11 (69)                      | 24 (73)                        | 0.77  |
| Diarrhea – no. (%)                                | 3 (19)                       | 11 (33)                        | 0.29  |
| Viral load, median (IQR), Ct                      | 33 (28-35)                   | 31 (27-35)                     | 0.66  |
| <b>Disease severity</b>                           |                              |                                |       |
| Nadir lymphocyte count, median (IQR), per $\mu$ l | 455 (200-905)                | 390 (250-550)                  | 0.56  |
| Peak hsCRP, median (IQR), mg/l                    | 256 (109-350)                | 199 (125-333)                  | 0.78  |
| Peak LDH, median (IQR), IU/l                      | 465 (391-604)                | 494 (357-622)                  | 0.90  |
| Peak D-dimers, median (IQR), ng/ml                | 1727 (1143-7118)             | 1979 (1234-5090)               | 0.98  |
| <b>Proximal tubule dysfunction</b>                |                              |                                |       |
| Aminoaciduria – no. (%)                           | 0/5 (0)                      | 6/8 (75)                       | 0.008 |
| Hypouricemia/inappr. uricosuria – no. (%)         | 4/15 (27)                    | 14/24 (58)                     | 0.05  |
| Hypophosphatemia/inappr. phosphaturia – no. (%)   | 1/10 (10)                    | 5/22 (23)                      | 0.39  |
| <b>Outcomes</b>                                   |                              |                                |       |
| Follow-up, median (IQR), days                     | 48 (30-57)                   | 44 (31-54)                     | 0.44  |
| Mechanical ventilation – no. (%)                  | 6 (38)                       | 13 (39)                        | 0.90  |
| Death – no. (%)                                   | 5 (31)                       | 9 (27)                         | 0.77  |
| Acute kidney injury – no. (%)                     | 3 (19)                       | 8 (24)                         | 0.67  |
| Hospital length of stay, median (IQR), days       | 17 (13-31)                   | 17 (9-31)                      | 0.96  |

U $\beta_2$ M, urinary  $\beta_2$ -microglobulin; hsCRP, highly sensitive C-reactive protein; LDH, lactate dehydrogenase; inappr., inappropriate.

**Supplementary Table 5. Characteristics of COVID-19 patients with and without hypouricemia and inappropriate uricosuria.**

|                                                   | Hypouricemia with inappropriate uricosuria |                   | P      |
|---------------------------------------------------|--------------------------------------------|-------------------|--------|
|                                                   | Absent<br>n=21                             | Present<br>n=18   |        |
| <b>Baseline characteristics</b>                   |                                            |                   |        |
| Age, median (IQR), years                          | 60 (54-75)                                 | 67 (61-73)        | 0.44   |
| Male gender – no. (%)                             | 11 (52)                                    | 13 (72)           | 0.20   |
| Fever – no. (%)                                   | 16 (76)                                    | 15 (83)           | 0.58   |
| Dyspnea – no. (%)                                 | 16 (76)                                    | 12 (67)           | 0.51   |
| Diarrhea – no. (%)                                | 5 (24)                                     | 6 (33)            | 0.51   |
| Viral load, median (IQR), Ct                      | 33 (30-35)                                 | 31 (26-35)        | 0.30   |
| <b>Disease severity</b>                           |                                            |                   |        |
| Nadir lymphocyte count, median (IQR), per $\mu$ l | 500 (280-910)                              | 250 (100-360)     | 0.006  |
| Peak hsCRP, median (IQR), mg/l                    | 126 (51-245)                               | 324 (243-349)     | 0.002  |
| Peak LDH, median (IQR), IU/l                      | 394 (317-466)                              | 584 (524-726)     | <0.001 |
| Peak D-dimers, median (IQR), ng/ml                | 1234 (753-2827)                            | 4461 (2098-13348) | 0.001  |
| <b>Proximal tubule dysfunction</b>                |                                            |                   |        |
| Elevated U $\beta$ 2M – no. (%)                   | 10 (48)                                    | 14 (78)           | 0.05   |
| Hypophosphatemia/inappr. phosphaturia – no. (%)   | 1 (7)                                      | 5 (31)            | 0.008  |
| Aminoaciduria – no. (%)                           | 1/4 (25)                                   | 4/8 (50)          | 0.41   |
| <b>Outcomes</b>                                   |                                            |                   |        |
| Follow-up, median (IQR), days                     | 42 (37-52)                                 | 38 (17-57)        | 0.68   |
| Mechanical ventilation – no. (%)                  | 3 (14)                                     | 15 (83)           | <0.001 |
| Death – no. (%)                                   | 3 (14)                                     | 9 (50)            | 0.02   |
| Acute kidney injury – no. (%)                     | 3 (14)                                     | 3 (17)            | 0.84   |
| Hospital length of stay, median (IQR), days       | 12 (6-17)                                  | 27 (17-46)        | <0.001 |

U $\beta$ 2M, urinary  $\beta$ <sub>2</sub>-microglobulin; hsCRP, highly sensitive C-reactive protein; LDH, lactate dehydrogenase; inappr., inappropriate.

**Supplementary Table 6. Characteristics of COVID-19 patients with and without hypophosphatemia and inappropriate phosphaturia.**

|                                                   | Hypophosphatemia with inappropriate phosphaturia |                    | P    |
|---------------------------------------------------|--------------------------------------------------|--------------------|------|
|                                                   | Absent<br>n=26                                   | Present<br>n=6     |      |
| <b>Baseline characteristics</b>                   |                                                  |                    |      |
| Age, median (IQR), years                          | 62 (54-73)                                       | 72 (64-77)         | 0.19 |
| Male gender – no. (%)                             | 17 (65)                                          | 3 (50)             | 0.48 |
| Fever – no. (%)                                   | 21 (81)                                          | 5 (83)             | 0.89 |
| Dyspnea – no. (%)                                 | 21 (81)                                          | 3 (50)             | 0.12 |
| Diarrhea – no. (%)                                | 7 (27)                                           | 2 (33)             | 0.75 |
| Viral load, median (IQR), Ct                      | 32 (28-35)                                       | 28 (27-31)         | 0.13 |
| <b>Disease severity</b>                           |                                                  |                    |      |
| Nadir lymphocyte count, median (IQR), per $\mu$ l | 295 (210-500)                                    | 565 (280-1000)     | 0.35 |
| Peak hsCRP, median (IQR), mg/l                    | 244 (107-348)                                    | 331 (199-387)      | 0.19 |
| Peak LDH, median (IQR), IU/l                      | 494 (391-604)                                    | 461 (436-524)      | 0.90 |
| Peak D-dimers, median (IQR), ng/ml                | 1935 (1208-6973)                                 | 14713 (7364-23613) | 0.02 |
| <b>Proximal tubule dysfunction</b>                |                                                  |                    |      |
| Elevated U $\beta$ 2M – no. (%)                   | 17 (65)                                          | 5 (83)             | 0.39 |
| Hypouricemia/inappr. uricosuria – no. (%)         | 11/25 (44)                                       | 5/6 (83)           | 0.08 |
| Aminoaciduria – no. (%)                           | 4/10 (40)                                        | 1/1 (100)          | 0.25 |
| <b>Outcomes</b>                                   |                                                  |                    |      |
| Follow-up, median (IQR), days                     | 44 (36-56)                                       | 26 (15-55)         | 0.28 |
| Mechanical ventilation – no. (%)                  | 14 (54)                                          | 4 (67)             | 0.57 |
| Death – no. (%)                                   | 6 (23)                                           | 4 (67)             | 0.04 |
| Acute kidney injury – no. (%)                     | 4 (15)                                           | 1 (17)             | 0.94 |
| Hospital length of stay, median (IQR), days       | 22 (7-45)                                        | 19 (15-29)         | 0.98 |

U $\beta$ 2M, urinary  $\beta$ <sub>2</sub>-microglobulin; hsCRP, highly sensitive C-reactive protein; LDH, lactate dehydrogenase; inappr., inappropriate.

**Supplementary Table 7. Characteristics of COVID-19 patients with and without aminoaciduria.**

|                                                   | Aminoaciduria    |                  | P     |
|---------------------------------------------------|------------------|------------------|-------|
|                                                   | Absent<br>n=7    | Present<br>n=6   |       |
| <b>Baseline characteristics</b>                   |                  |                  |       |
| Age, median (IQR), years                          | 63 (59-69)       | 62 (56-76)       | 0.89  |
| Male gender – no. (%)                             | 5 (71)           | 6 (100)          | 0.16  |
| Fever – no. (%)                                   | 5 (71)           | 5 (83)           | 0.61  |
| Dyspnea – no. (%)                                 | 5 (71)           | 6 (100)          | 0.16  |
| Diarrhea – no. (%)                                | 1 (14)           | 2 (33)           | 0.42  |
| Viral load, median (IQR), Ct                      | 34 (32-35)       | 34 (33-39)       | 0.52  |
| <b>Disease severity</b>                           |                  |                  |       |
| Nadir lymphocyte count, median (IQR), per $\mu$ l | 300 (190-460)    | 265 (240-470)    | 0.89  |
| Peak hsCRP, median (IQR), mg/l                    | 284 (245-346)    | 247 (167-333)    | 0.67  |
| Peak LDH, median (IQR), IU/l                      | 570 (394-726)    | 625 (494-769)    | 0.81  |
| Peak D-dimers, median (IQR), ng/ml                | 3059 (1143-6973) | 3007 (2127-4461) | 1.00  |
| <b>Proximal tubule dysfunction</b>                |                  |                  |       |
| Elevated U $\beta$ 2M – no. (%)                   | 2 (29)           | 6 (100)          | 0.008 |
| Hypouricemia/inappr. uricosuria – no. (%)         | 4 (57)           | 4/5 (80)         | 0.41  |
| Hypophosphatemia/inappr. phosphaturia – no. (%)   | 0 (0)            | 1/5 (20)         | 0.25  |
| <b>Outcomes</b>                                   |                  |                  |       |
| Follow-up duration, median (IQR), days            | 52 (15-57)       | 41 (34-57)       | 0.78  |
| Mechanical ventilation – no. (%)                  | 4 (57)           | 4 (67)           | 0.73  |
| Death – no. (%)                                   | 2 (29)           | 1 (17)           | 0.61  |
| Acute kidney injury – no. (%)                     | 2 (29)           | 0 (0)            | 0.16  |
| Hospital length of stay, median (IQR), days       | 23 (14-53)       | 39 (26-57)       | 0.67  |

U $\beta$ 2M, urinary  $\beta$ 2-microglobulin; hsCRP, highly sensitive C-reactive protein; LDH, lactate dehydrogenase; inappr., inappropriate.

**Supplementary Table 8. Cox and competing risks regressions for time to invasive mechanical ventilation according to the presence of proximal tubule dysfunction.**

|                                                  | Unadjusted |               |          | Adjusted*  |               |          |
|--------------------------------------------------|------------|---------------|----------|------------|---------------|----------|
|                                                  | HR         | 95% CI        | P        | HR         | 95% CI        | P        |
| <b>Cox (mechanical ventilation or death)</b>     |            |               |          |            |               |          |
| Elevated urinary $\beta_2$ -microglobulin        | 1.03       | 0.44, 2.39    | 0.95     | -          | -             | -        |
| Hypophosphatemia with inappropriate phosphaturia | 0.86       | 0.31, 2.41    | 0.78     | -          | -             | -        |
| Hypouricemia with inappropriate uricosuria       | 4.60       | 1.69, 12.51   | 0.003    | 6.23       | 1.93, 20.07   | 0.002    |
| Aminoaciduria                                    | 1.10       | 0.27, 4.49    | 0.90     | -          | -             | -        |
| <b>Competing risks (mechanical ventilation)</b>  | <b>sHR</b> | <b>95% CI</b> | <b>P</b> | <b>sHR</b> | <b>95% CI</b> | <b>P</b> |
| Elevated urinary $\beta_2$ -microglobulin        | 0.97       | 0.36, 2.57    | 0.95     | -          | -             | -        |
| Hypophosphatemia with inappropriate phosphaturia | 1.05       | 0.43, 2.58    | 0.91     | -          | -             | -        |
| Hypouricemia with inappropriate uricosuria       | 8.72       | 2.25, 33.77   | 0.002    | 12.14      | 2.66, 55.37   | 0.001    |
| Aminoaciduria                                    | 0.86       | 0.22, 3.27    | 0.82     | -          | -             | -        |

\*Adjusted for prespecified covariates including age, gender, LDH, hsCRP and lymphocyte count at admission. Competing risk analyses taking into account competing risks of death and discharge.

**Supplementary Table 9. Characteristics of COVID-19 patients with post-mortem examination of the kidneys.**

| <b>Pt</b> | <b>Age (yrs)</b> | <b>Gender</b> | <b>HTN</b> | <b>Diabetes</b> | <b>Hypotension/<br/>vasopressors</b> | <b>UPCR<br/>(g/g)</b> | <b>U<math>\beta</math><sub>2</sub>M</b> | <b>HypoU<br/>Inappr.<br/>UAuria</b> | <b>HypoP<br/>Inappr.<br/>Puria</b> | <b>AAuria</b> | <b>AKI</b> | <b>Dialysis</b> | <b>Pathologic<br/>evaluation</b> | <b>EM</b> |
|-----------|------------------|---------------|------------|-----------------|--------------------------------------|-----------------------|-----------------------------------------|-------------------------------------|------------------------------------|---------------|------------|-----------------|----------------------------------|-----------|
| 1         | 74               | Male          | +          | +               | +                                    | 0.7                   | +                                       | +                                   | -                                  | NA            | +          | -               | +                                | NA        |
| 2         | 71               | Female        | +          | -               | +                                    | 1.5                   | +                                       | +                                   | -                                  | NA            | -          | -               | +                                | NA        |
| 3         | 64               | Male          | +          | -               | -                                    | 1.5                   | +                                       | +                                   | +                                  | NA            | -          | -               | +                                | NA        |
| 4         | 57               | Male          | -          | -               | +                                    | NA                    | NA                                      | NA                                  | NA                                 | NA            | +          | +               | +                                | +         |
| 5         | 82               | Female        | +          | -               | -                                    | 0.6                   | -                                       | -                                   | -                                  | NA            | +          | -               | +                                | +         |
| 6         | 60               | Male          | -          | -               | +                                    | 3.3                   | -                                       | -                                   | -                                  | NA            | +          | +               | +                                | +         |

Pt, patient; yrs, years; HTN, hypertension; UPCR, urinary protein to creatinine ratio; U $\beta$ <sub>2</sub>M, urinary  $\beta$ <sub>2</sub>-microglobulin; HypoU Inappr. UAuria, hypouricemia with inappropriate uricosuria; HypoP Inappr. Puria, hypophosphatemia with inappropriate phosphaturia; AAuria, aminoaciduria; AKI, acute kidney injury; EM, electron microscopy; NA, not available.

**Supplementary Table 10. Pathologic evaluation of kidneys from patients with COVID-19.**

| <b>Patient</b> | <b>n scler./total glomeruli</b> | <b>IFTA (%)</b> | <b>Tubular injury</b> | <b>Loss of brush border</b> | <b>Luminal debris</b> | <b>Vacuolization of tubular cells</b> | <b>Erythrocytes aggregates</b> | <b>Glomerular lesions</b> | <b>Interstitial inflammation</b> |
|----------------|---------------------------------|-----------------|-----------------------|-----------------------------|-----------------------|---------------------------------------|--------------------------------|---------------------------|----------------------------------|
| 1              | 23/381                          | 1-25            | +                     | +                           | -                     | -                                     | +                              | FSGS <sup>a</sup>         | -                                |
| 2              | 38/423                          | 1-25            | +                     | -                           | +                     | -                                     | +                              | -                         | Focal                            |
| 3              | 11/184                          | 1-25            | +                     | +                           | +                     | -                                     | +                              | -                         | Focal                            |
| 4              | 6/376                           | 1-25            | +                     | +                           | +                     | -                                     | -                              | -                         | -                                |
| 5              | 45/770                          | 1-25            | +                     | +                           | -                     | -                                     | +                              | -                         | -                                |
| 6              | 11/359                          | 1-25            | +                     | +                           | +                     | + <sup>b</sup>                        | +                              | -                         | -                                |

<sup>a</sup>Tip lesion variant. <sup>b</sup>Non-isometric vacuoles. Scler., sclerotic (globally); IFTA, interstitial fibrosis and tubular atrophy; FSGS, focal and segmental sclerosis.



**Supplementary Table 11. Mouse primer pairs for gene expression analysis.**

| <b>Gene name</b> | <b>Forward primer (5'-3')</b> | <b>Reverse primer (5'-3')</b> | <b>PCR products (bps)</b> | <b>Efficiency</b> |
|------------------|-------------------------------|-------------------------------|---------------------------|-------------------|
| <i>Gapdh</i>     | TGCACCACCAACTGCTTAGC          | GGATGCAGGGATGATGTTCT          | 176                       | 1.04 ± 0.03       |
| <i>Nphs2</i>     | GTCTAGCCCATGTGTCCAAA          | CCACTTTGATGCCCAAATA           | 162                       | 1.03 ± 0.03       |
| <i>Slc12a3</i>   | CATGGTCTCCTTTGCCAACT          | TGCCAAAGAAGCTACCATCA          | 148                       | 1.01 ± 0.03       |
| <i>Slc12a1</i>   | CCGTGGCCTACATAGGTGTT          | GGCTCGTGTTGACATCTTGA          | 154                       | 0.99 ± 0.04       |
| <i>Aqp2</i>      | TCACTGGGTCTTCTGGATCG          | CGTTCCTCCCAGTCAGTGT           | 147                       | 1.03 ± 0.04       |
| <i>Slc5a2</i>    | TTGGGCATCACCATGATTTA          | GCTCCCAGGTATTTGTCGAA          | 164                       | 1.01 ± 0.03       |
| <i>Slc38a3</i>   | GTTATCTTCGCCCCAACAT           | TGGGCATGATTCGGAAGTAG          | 109                       | 0.99 ± 0.02       |
| <i>Ace2</i>      | TCCAGACTCCGATCATCAAGC         | TGTGGGTTCTTTGGGTTGCA          | 154                       | 1.01 ± 0.03       |
| <i>Cltn</i>      | GTCGTTCTGGTTTGTGGTCA          | GGGGGAGCAAGAGTAGAAG           | 162                       | 0.98 ± 0.02       |
| <i>Slc6a19</i>   | TTGCTGGCTCCATTCCTCTG          | GACTGACCACTCTCCACGTG          | 153                       | 1.02 ± 0.03       |
| <i>Slc22a12</i>  | TTACGACCACAGCACCTTCA          | TTCTGCGCCCAAACCTATCT          | 158                       | 1.01 ± 0.02       |
| <i>Slc34a1</i>   | CTGGGTCACGGGCTACTTT           | ATGTTGGAGTCCAGGGTGAG          | 153                       | 0.99 ± 0.02       |
